# Supplementary material for: Astragalosidic Acid: A New Water-Soluble Derivative of Astragaloside IV Prepared Using Remarkably Simple TEMPO-Mediated Oxidation
Source: MDPI journal article supplement (doi:10.3390/molecules22081275), 2017-07-31

## Supplementary data

Supplementary data ( $^1\text{H}$ ,  $^{13}\text{C}$ , DEPT ( $\theta = 90^\circ$ ), DEPT ( $\theta = 135^\circ$ ), H-H COSY, HMBC and HSQC spectra for compound **1**) associated with this article can be found as following:

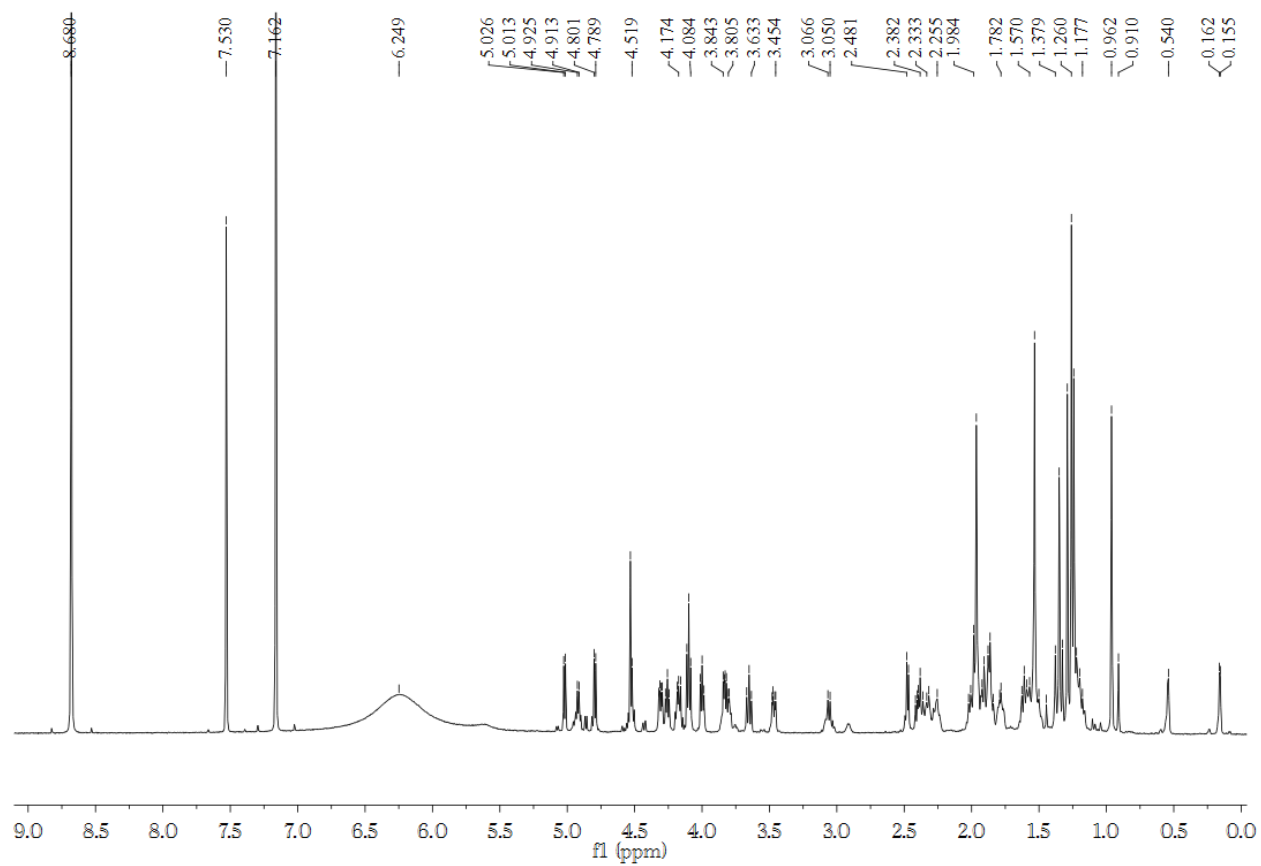

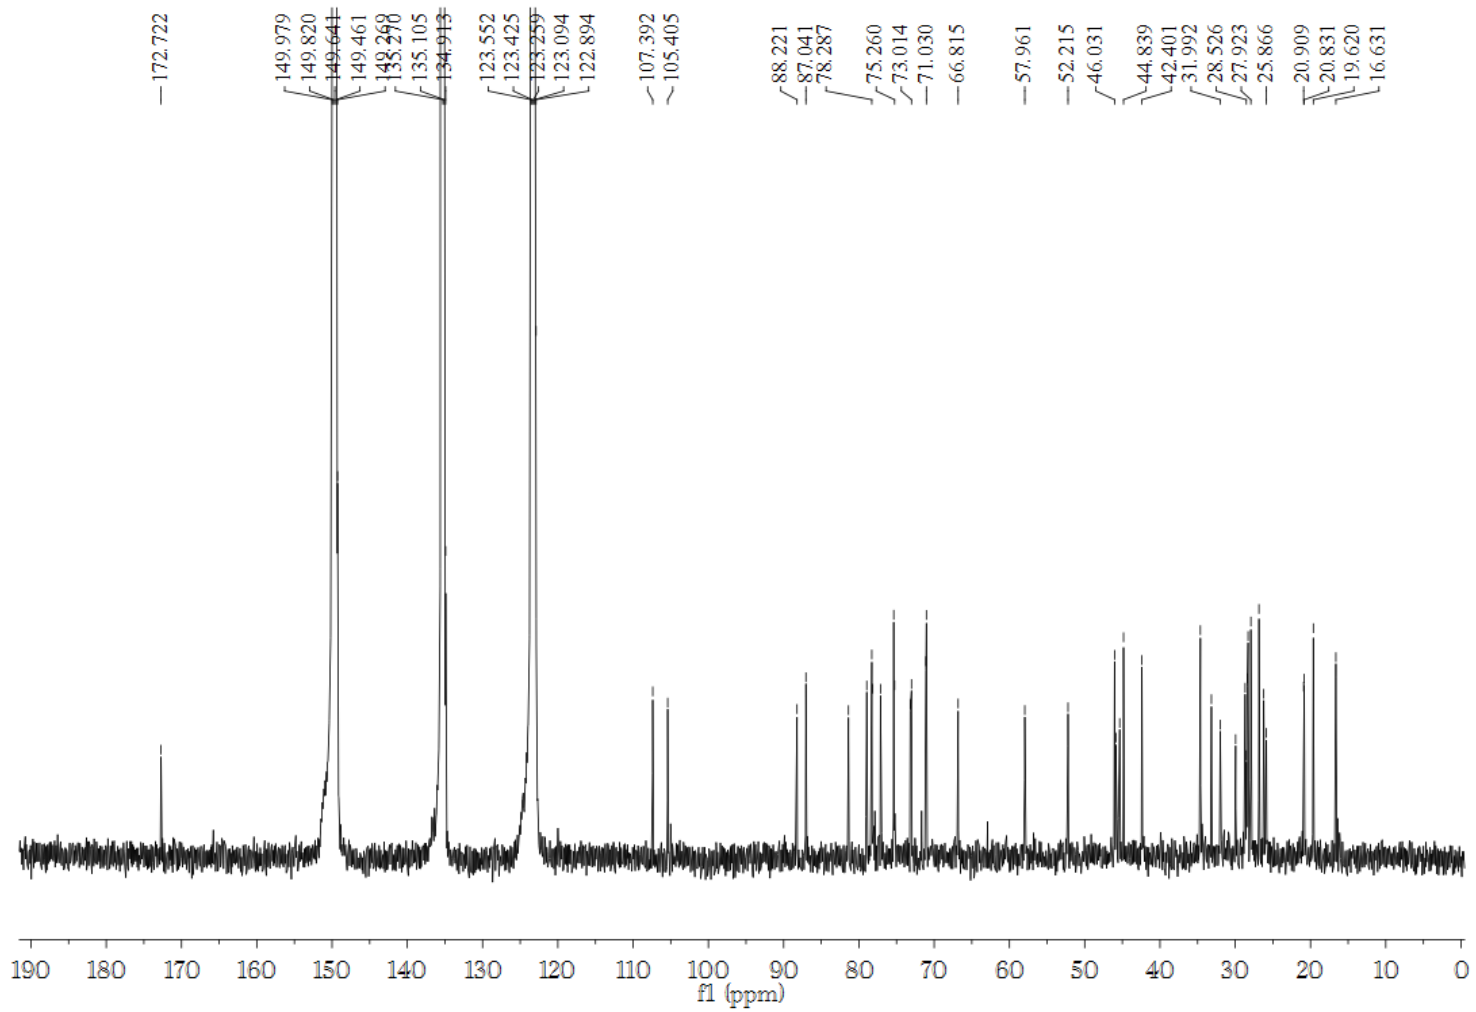

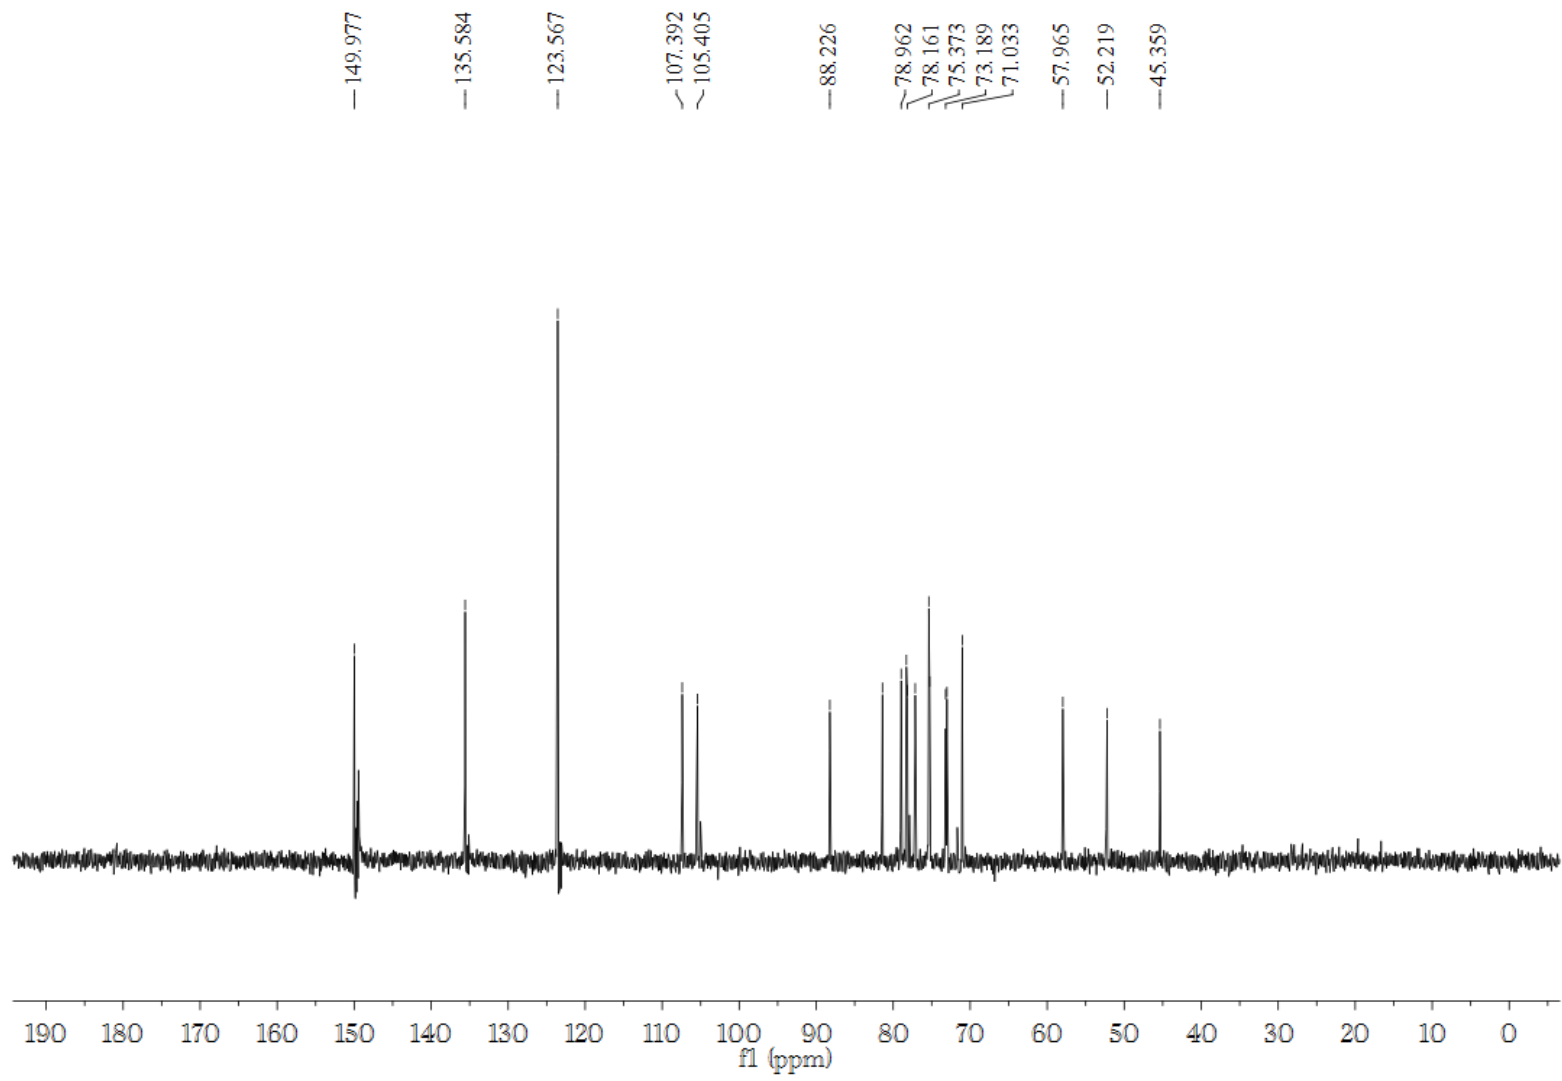

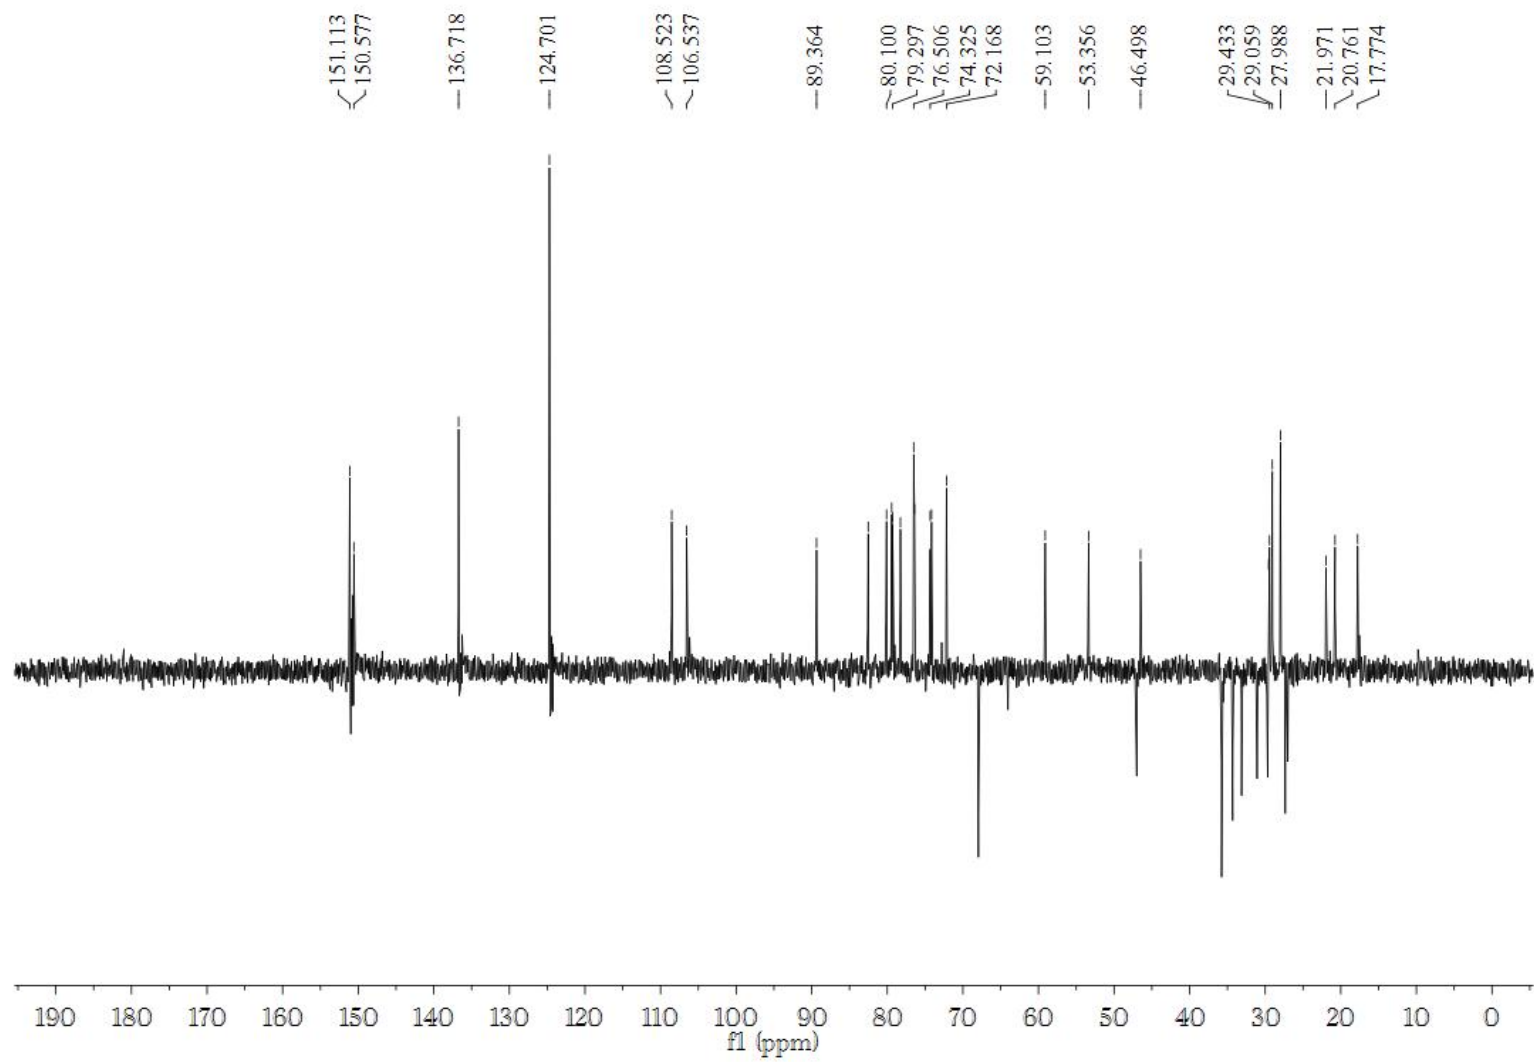

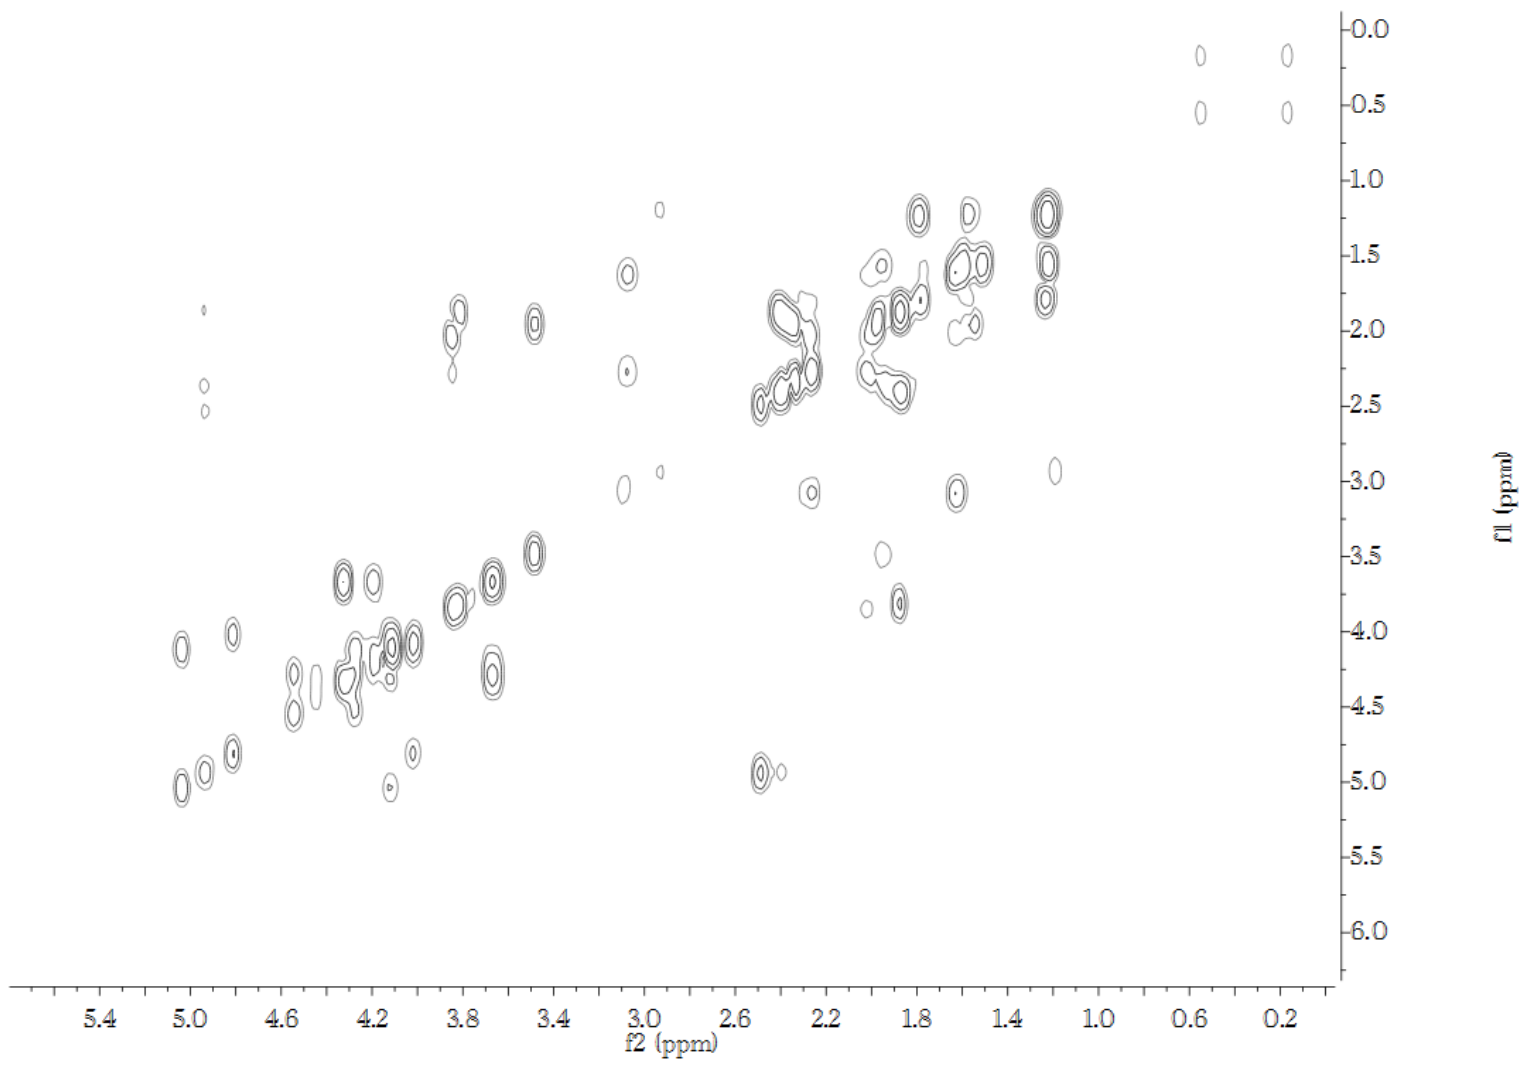

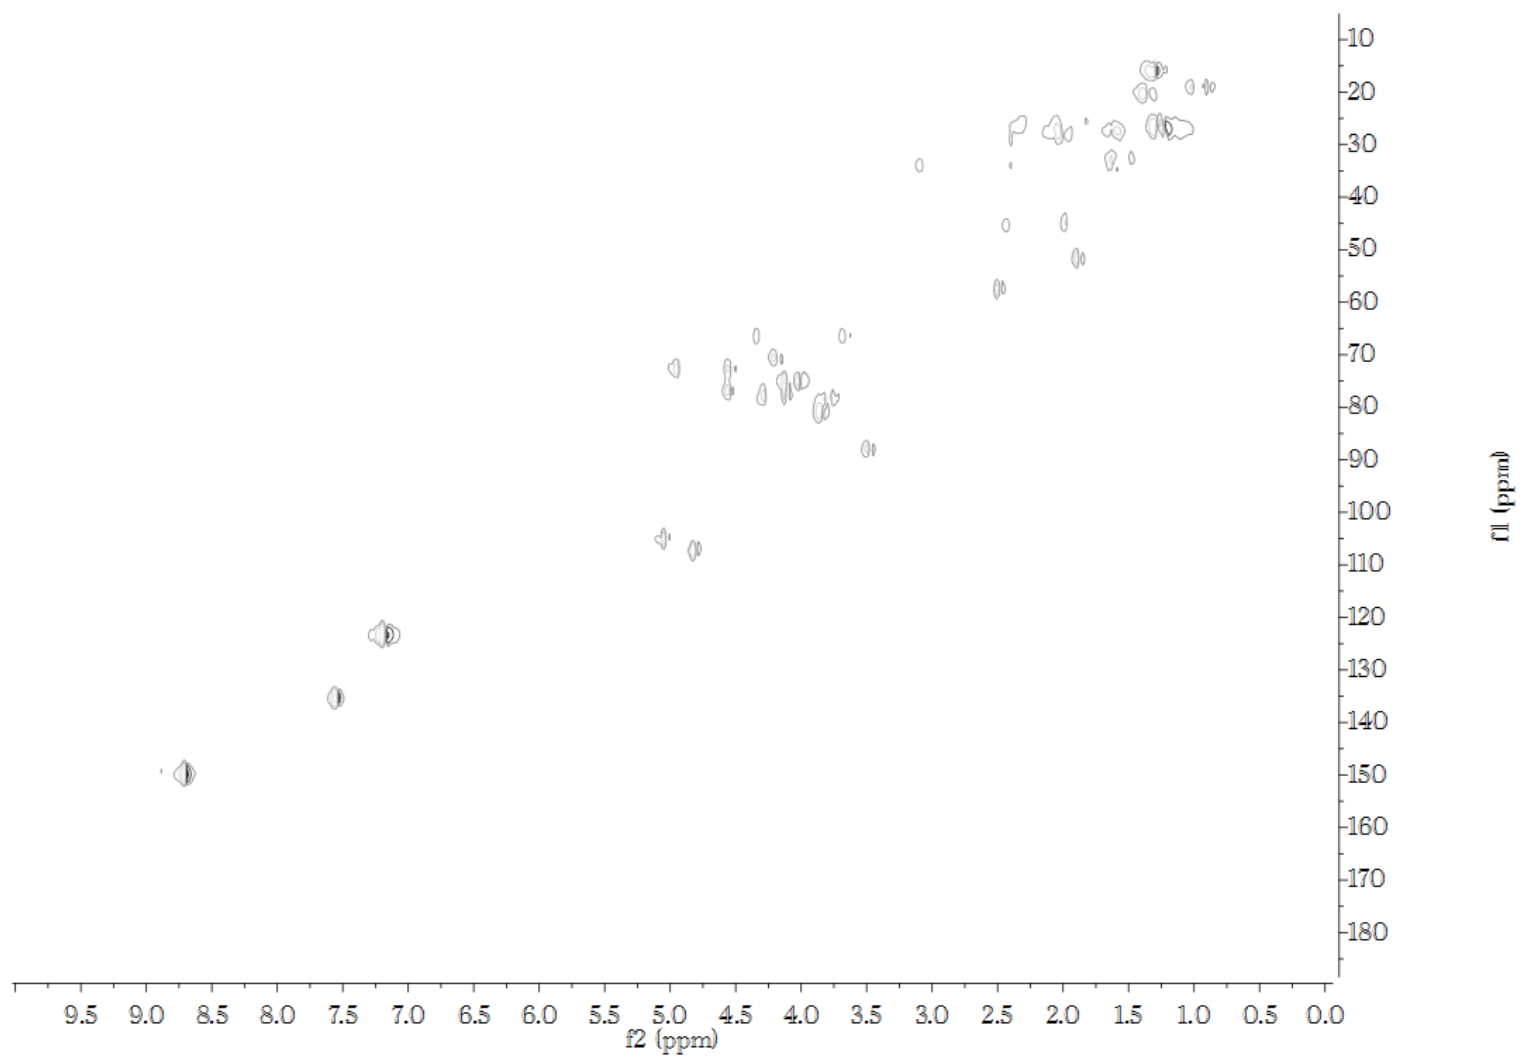

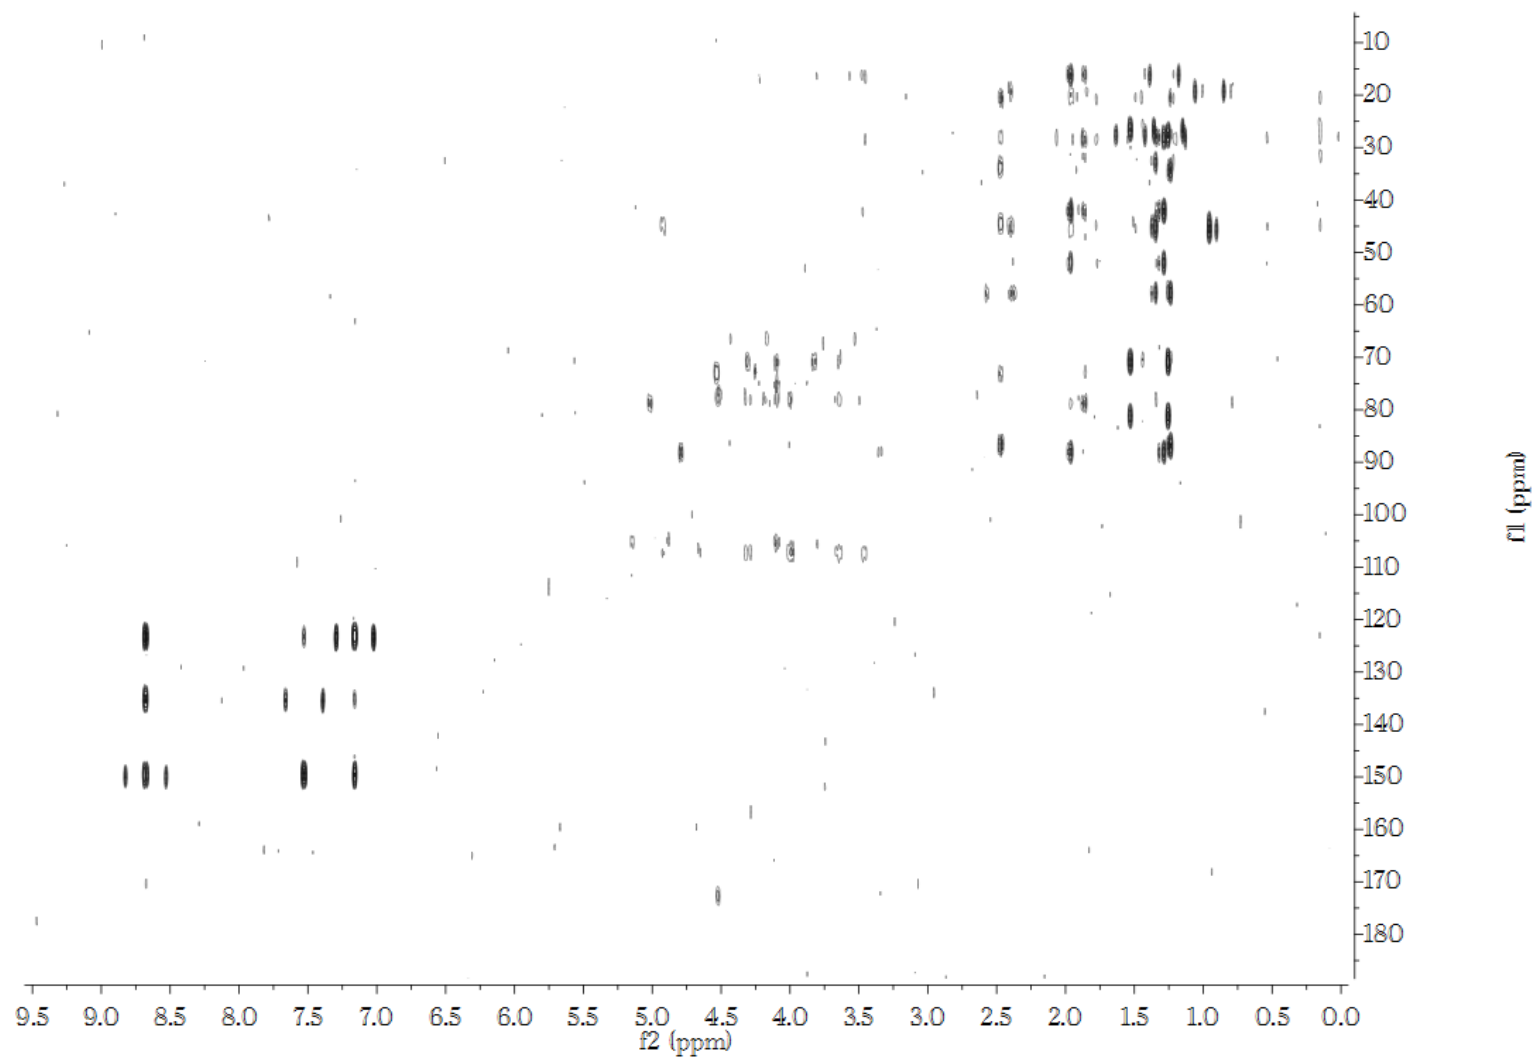

Supplement: s1 [file s1]
